# Supplementary material for: Cocoa procyanidins modulate transcriptional pathways linked to inflammation and metabolism in human dendritic cells
Source: Royal Society of Chemistry journal article supplement (doi:10.1039/c8fo00387d), 2018-01-01
Supplement: c8fo00387d2.xlsx [file c8fo00387d2.xlsx]

## Sheet: Up regulated 
Gene Name	Gene ID	fold change	q value
SPINK1	Homo sapiens serine peptidase inhibitor, Kazal type 1 (SPINK1), mRNA.	9.3252	0
NMB	Homo sapiens neuromedin B (NMB), transcript variant 1, mRNA.	6.3457	0
ENTHD1	Homo sapiens ENTH domain containing 1 (ENTHD1), mRNA.	4.3496	0
ADCY3	Homo sapiens adenylate cyclase 3 (ADCY3), mRNA.	3.8219	0
IL1F9	Homo sapiens interleukin 1 family, member 9 (IL1F9), mRNA.	3.6932	0
MMP10	Homo sapiens matrix metallopeptidase 10 (stromelysin 2) (MMP10), mRNA.	3.6464	0
SLC39A11	Homo sapiens solute carrier family 39 (metal ion transporter), member 11 (SLC39A11), mRNA.	3.448	0
ANKRD22	Homo sapiens ankyrin repeat domain 22 (ANKRD22), mRNA.	3.2622	0
NPC1	Homo sapiens Niemann-Pick disease, type C1 (NPC1), mRNA.	2.9068	0.720672
RENBP	Homo sapiens renin binding protein (RENBP), mRNA.	2.8282	1.83933
ANKRD57	Homo sapiens ankyrin repeat domain 57 (ANKRD57), mRNA.	2.7686	0
VAT1	Homo sapiens vesicle amine transport protein 1 homolog (T. californica) (VAT1), mRNA.	2.7624	0
C14orf109	Homo sapiens chromosome 14 open reading frame 109 (C14orf109), transcript variant 2, mRNA.	2.7071	0
ITPR1	Homo sapiens inositol 1,4,5-triphosphate receptor, type 1 (ITPR1), transcript variant 2, mRNA.	2.6533	0
SETDB2	Homo sapiens SET domain, bifurcated 2 (SETDB2), mRNA.	2.639	0
H2AFY2	Homo sapiens H2A histone family, member Y2 (H2AFY2), mRNA.	2.6099	0
ETS2	Homo sapiens v-ets erythroblastosis virus E26 oncogene homolog 2 (avian) (ETS2), mRNA.	2.5769	6.01146
C5AR1	Homo sapiens complement component 5a receptor 1 (C5AR1), mRNA.	2.5501	2.79173
RRAGD	Homo sapiens Ras-related GTP binding D (RRAGD), mRNA.	2.5051	0.720672
TM7SF4	Homo sapiens transmembrane 7 superfamily member 4 (TM7SF4), mRNA.	2.4718	4.3772
GZMB	Homo sapiens granzyme B (granzyme 2, cytotoxic T-lymphocyte-associated serine esterase 1) (GZMB), mRNA.	2.4541	0
SLC1A4	Homo sapiens solute carrier family 1 (glutamate/neutral amino acid transporter), member 4 (SLC1A4), mRNA.	2.4314	0.720672
DHRS11	Homo sapiens dehydrogenase/reductase (SDR family) member 11 (DHRS11), mRNA.	2.4083	0
DAB2	Homo sapiens disabled homolog 2, mitogen-responsive phosphoprotein (Drosophila) (DAB2), mRNA.	2.4081	0
GFOD1	Homo sapiens glucose-fructose oxidoreductase domain containing 1 (GFOD1), mRNA.	2.4021	0
DENND2D	Homo sapiens DENN/MADD domain containing 2D (DENND2D), mRNA.	2.3846	0
TSPAN3	Homo sapiens tetraspanin 3 (TSPAN3), transcript variant 1, mRNA.	2.3279	0
PMP22	Homo sapiens peripheral myelin protein 22 (PMP22), transcript variant 2, mRNA.	2.326	6.91845
IL1R1	Homo sapiens interleukin 1 receptor, type I (IL1R1), mRNA.	2.2978	0.720672
RHCG	Homo sapiens Rh family, C glycoprotein (RHCG), mRNA.	2.2941	6.01146
GPNMB	Homo sapiens glycoprotein (transmembrane) nmb (GPNMB), transcript variant 2, mRNA.	2.2755	0
GNPDA1	Homo sapiens glucosamine-6-phosphate deaminase 1 (GNPDA1), mRNA.	2.2638	0
TNS3	Homo sapiens tensin 3 (TNS3), mRNA.	2.2592	0
LY9	Homo sapiens lymphocyte antigen 9 (LY9), transcript variant 2, mRNA.	2.2573	2.79173
BCAT1	Homo sapiens branched chain aminotransferase 1, cytosolic (BCAT1), mRNA.	2.2444	0
TM4SF19	Homo sapiens transmembrane 4 L six family member 19 (TM4SF19), mRNA.	2.2442	0
BAALC	Homo sapiens brain and acute leukemia, cytoplasmic (BAALC), transcript variant 2, mRNA.	2.2414	0
NCRNA00092	Homo sapiens non-protein coding RNA 92 (NCRNA00092), non-coding RNA.	2.2335	4.66137
RRP12	Homo sapiens ribosomal RNA processing 12 homolog (S. cerevisiae) (RRP12), mRNA.	2.204	1.83933
CHST15	Homo sapiens carbohydrate (N-acetylgalactosamine 4-sulfate 6-O) sulfotransferase 15 (CHST15), mRNA.	2.1993	0
SPHK1	Homo sapiens sphingosine kinase 1 (SPHK1), transcript variant 2, mRNA.	2.1956	2.79173
PDK3	Homo sapiens pyruvate dehydrogenase kinase, isozyme 3 (PDK3), mRNA.	2.1903	1.83933
SGK1	Homo sapiens serum/glucocorticoid regulated kinase 1 (SGK1), transcript variant 1, mRNA.	2.1672	1.83933
ECHDC3	Homo sapiens enoyl Coenzyme A hydratase domain containing 3 (ECHDC3), mRNA.	2.145	2.79173
CGNL1	Homo sapiens cingulin-like 1 (CGNL1), mRNA.	2.1429	4.66137
UPP1	Homo sapiens uridine phosphorylase 1 (UPP1), transcript variant 1, mRNA.	2.1426	0
BANP	Homo sapiens BTG3 associated nuclear protein (BANP), transcript variant 1, mRNA.	2.1311	0
SLCO4A1	Homo sapiens solute carrier organic anion transporter family, member 4A1 (SLCO4A1), mRNA.	2.1282	0.720672
TBC1D2	Homo sapiens TBC1 domain family, member 2 (TBC1D2), mRNA.	2.1215	0
ESPNL	Homo sapiens espin-like (ESPNL), mRNA.	2.1042	0
CNKSR3	Homo sapiens CNKSR family member 3 (CNKSR3), mRNA.	2.0966	0
C13orf15	Homo sapiens chromosome 13 open reading frame 15 (C13orf15), mRNA.	2.0794	4.3772
ATP6V1H	Homo sapiens ATPase, H+ transporting, lysosomal 50/57kDa, V1 subunit H (ATP6V1H), transcript variant 3, mRNA.	2.0672	0
DFNA5	Homo sapiens deafness, autosomal dominant 5 (DFNA5), transcript variant 1, mRNA.	2.0428	4.66137
CALU	Homo sapiens calumenin (CALU), mRNA.	2.0333	0
DDIT4	Homo sapiens DNA-damage-inducible transcript 4 (DDIT4), mRNA.	2.0298	0
SLC38A6	Homo sapiens solute carrier family 38, member 6 (SLC38A6), mRNA.	2.0272	2.79173
SGK	Homo sapiens serum/glucocorticoid regulated kinase (SGK), mRNA.	1.9948	2.79173
ATP6V0A2	Homo sapiens ATPase, H+ transporting, lysosomal V0 subunit a2 (ATP6V0A2), mRNA.	1.9903	0.720672
SPIRE1	Homo sapiens spire homolog 1 (Drosophila) (SPIRE1), transcript variant 2, mRNA.	1.9863	1.83933
STAMBPL1	Homo sapiens STAM binding protein-like 1 (STAMBPL1), mRNA.	1.9793	0
SLC25A37	Homo sapiens solute carrier family 25, member 37 (SLC25A37), nuclear gene encoding mitochondrial protein, mRNA.	1.9677	0
DUSP3	Homo sapiens dual specificity phosphatase 3 (vaccinia virus phosphatase VH1-related) (DUSP3), mRNA.	1.9641	0
MATK	Homo sapiens megakaryocyte-associated tyrosine kinase (MATK), transcript variant 3, mRNA.	1.9545	4.66137
RAP1GAP	Homo sapiens RAP1 GTPase activating protein (RAP1GAP), mRNA.	1.9461	0
TBC1D7	Homo sapiens TBC1 domain family, member 7 (TBC1D7), mRNA.	1.9316	0
PHACTR1	Homo sapiens phosphatase and actin regulator 1 (PHACTR1), mRNA.	1.926	1.83933
NSMAF	Homo sapiens neutral sphingomyelinase (N-SMase) activation associated factor (NSMAF), mRNA.	1.9171	2.79173
CTNS	Homo sapiens cystinosis, nephropathic (CTNS), transcript variant 2, mRNA.	1.9159	0
ARID3A	Homo sapiens AT rich interactive domain 3A (BRIGHT-like) (ARID3A), mRNA.	1.9065	6.91845
ENO2	Homo sapiens enolase 2 (gamma, neuronal) (ENO2), mRNA.	1.8946	2.79173
FARP1	Homo sapiens FERM, RhoGEF (ARHGEF) and pleckstrin domain protein 1 (chondrocyte-derived) (FARP1), transcript variant 2, mRNA.	1.8853	1.83933
P2RY1	Homo sapiens purinergic receptor P2Y, G-protein coupled, 1 (P2RY1), mRNA.	1.8824	0.720672
FNIP2	Homo sapiens folliculin interacting protein 2 (FNIP2), mRNA.	1.8773	1.83933
NRIP3	Homo sapiens nuclear receptor interacting protein 3 (NRIP3), mRNA.	1.8748	4.3772
CEP68	Homo sapiens centrosomal protein 68kDa (CEP68), mRNA.	1.8707	0
EPDR1	Homo sapiens ependymin related protein 1 (zebrafish) (EPDR1), mRNA.	1.8687	4.66137
C1orf85	Homo sapiens chromosome 1 open reading frame 85 (C1orf85), mRNA.	1.8588	0
COBL	Homo sapiens cordon-bleu homolog (mouse) (COBL), mRNA.	1.8579	6.01146
CTSL1	Homo sapiens cathepsin L1 (CTSL1), transcript variant 2, mRNA.	1.8578	0.720672
GAS2L3	Homo sapiens growth arrest-specific 2 like 3 (GAS2L3), mRNA.	1.8546	0
CSNK1G1	Homo sapiens casein kinase 1, gamma 1 (CSNK1G1), transcript variant 2, mRNA.	1.8423	2.79173
SPNS1	Homo sapiens spinster homolog 1 (Drosophila) (SPNS1), mRNA.	1.8382	0
ZFYVE28	Homo sapiens zinc finger, FYVE domain containing 28 (ZFYVE28), mRNA.	1.8308	4.66137
SAV1	Homo sapiens salvador homolog 1 (Drosophila) (SAV1), mRNA.	1.827	0
KLHL21	Homo sapiens kelch-like 21 (Drosophila) (KLHL21), mRNA.	1.8248	6.01146
REEP5	Homo sapiens receptor accessory protein 5 (REEP5), mRNA.	1.8167	1.83933
SLC2A3	Homo sapiens solute carrier family 2 (facilitated glucose transporter), member 3 (SLC2A3), mRNA.	1.8102	6.01146
FCGR2A	Homo sapiens Fc fragment of IgG, low affinity IIa, receptor (CD32) (FCGR2A), mRNA.	1.7915	1.83933
CHCHD6	Homo sapiens coiled-coil-helix-coiled-coil-helix domain containing 6 (CHCHD6), mRNA.	1.7851	2.79173
ATP6V1F	Homo sapiens ATPase, H+ transporting, lysosomal 14kDa, V1 subunit F (ATP6V1F), mRNA.	1.768	2.79173
CD59	Homo sapiens CD59 molecule, complement regulatory protein (CD59), transcript variant 2, mRNA.	1.766	0
ST3GAL3	Homo sapiens ST3 beta-galactoside alpha-2,3-sialyltransferase 3 (ST3GAL3), transcript variant 8, mRNA.	1.7639	4.66137
BAI1	Homo sapiens brain-specific angiogenesis inhibitor 1 (BAI1), mRNA.	1.7637	4.66137
IGF2R	Homo sapiens insulin-like growth factor 2 receptor (IGF2R), mRNA.	1.7567	2.79173
HK2	Homo sapiens hexokinase 2 (HK2), mRNA.	1.7544	2.79173
MAD1L1	Homo sapiens MAD1 mitotic arrest deficient-like 1 (yeast) (MAD1L1), transcript variant 2, mRNA.	1.7471	2.79173
IRAK3	Homo sapiens interleukin-1 receptor-associated kinase 3 (IRAK3), mRNA.	1.7349	2.79173
HS1BP3	Homo sapiens HCLS1 binding protein 3 (HS1BP3), mRNA.	1.7251	2.79173
UBTD2	Homo sapiens ubiquitin domain containing 2 (UBTD2), mRNA.	1.7245	2.79173
TTC39B	Homo sapiens tetratricopeptide repeat domain 39B (TTC39B), mRNA.	1.7232	2.79173
C3orf39	Homo sapiens chromosome 3 open reading frame 39 (C3orf39), mRNA.	1.7202	2.79173
RBMS1	Homo sapiens RNA binding motif, single stranded interacting protein 1 (RBMS1), transcript variant 2, mRNA.	1.7164	2.79173
VEGFA	Homo sapiens vascular endothelial growth factor A (VEGFA), transcript variant 3, mRNA.	1.7149	2.79173
NUDT16	Homo sapiens nudix (nucleoside diphosphate linked moiety X)-type motif 16 (NUDT16), mRNA.	1.7113	2.79173
BRI3	Homo sapiens brain protein I3 (BRI3), mRNA.	1.7004	6.01146
NT5C2	Homo sapiens 5'-nucleotidase, cytosolic II (NT5C2), mRNA.	1.696	1.83933
PSTPIP1	Homo sapiens proline-serine-threonine phosphatase interacting protein 1 (PSTPIP1), mRNA.	1.6852	2.79173
SLC25A13	Homo sapiens solute carrier family 25, member 13 (citrin) (SLC25A13), mRNA.	1.6796	4.3772
CCND3	Homo sapiens cyclin D3 (CCND3), mRNA.	1.6702	2.79173
AVPI1	Homo sapiens arginine vasopressin-induced 1 (AVPI1), mRNA.	1.6697	4.3772
SEC11A	Homo sapiens SEC11 homolog A (S. cerevisiae) (SEC11A), mRNA.	1.6655	2.79173
AQP9	Homo sapiens aquaporin 9 (AQP9), mRNA.	1.6638	4.66137
PDSS1	Homo sapiens prenyl (decaprenyl) diphosphate synthase, subunit 1 (PDSS1), mRNA.	1.6486	2.79173
FABP3	Homo sapiens fatty acid binding protein 3, muscle and heart (mammary-derived growth inhibitor) (FABP3), mRNA.	1.6448	4.3772
SQSTM1	Homo sapiens sequestosome 1 (SQSTM1), mRNA.	1.6392	2.79173
ZNF318	Homo sapiens zinc finger protein 318 (ZNF318), mRNA.	1.6357	4.3772
C5orf32	Homo sapiens chromosome 5 open reading frame 32 (C5orf32), mRNA.	1.6274	4.66137
MPP1	Homo sapiens membrane protein, palmitoylated 1, 55kDa (MPP1), mRNA.	1.6232	4.66137
MID1IP1	Homo sapiens MID1 interacting protein 1 (gastrulation specific G12 homolog (zebrafish)) (MID1IP1), mRNA.	1.6217	6.01146
FAM113B	Homo sapiens family with sequence similarity 113, member B (FAM113B), mRNA.	1.6207	4.66137
OSBPL1A	Homo sapiens oxysterol binding protein-like 1A (OSBPL1A), transcript variant OSBPL1A, mRNA.	1.6207	6.01146
ARHGAP21	Homo sapiens Rho GTPase activating protein 21 (ARHGAP21), mRNA.	1.6203	1.83933
TPCN2	Homo sapiens two pore segment channel 2 (TPCN2), mRNA.	1.6082	4.66137
FAM195A	Homo sapiens family with sequence similarity 195, member A (FAM195A), mRNA.	1.6081	2.79173
PCK2	Homo sapiens phosphoenolpyruvate carboxykinase 2 (mitochondrial) (PCK2), nuclear gene encoding mitochondrial protein, transcript variant 2, mRNA.	1.6045	2.79173
RAMP1	Homo sapiens receptor (G protein-coupled) activity modifying protein 1 (RAMP1), mRNA.	1.6025	4.66137
SLC11A2	Homo sapiens solute carrier family 11 (proton-coupled divalent metal ion transporters), member 2 (SLC11A2), mRNA.	1.5993	2.79173
ACTN1	Homo sapiens actinin, alpha 1 (ACTN1), mRNA.	1.592	2.79173
FREQ	Homo sapiens frequenin homolog (Drosophila) (FREQ), mRNA.	1.591	4.66137
TMEM206	Homo sapiens transmembrane protein 206 (TMEM206), mRNA.	1.5837	4.3772
C5orf13	Homo sapiens chromosome 5 open reading frame 13 (C5orf13), mRNA.	1.5663	6.01146
PLXNA1	Homo sapiens plexin A1 (PLXNA1), mRNA.	1.5598	6.01146
SFRP4	Homo sapiens secreted frizzled-related protein 4 (SFRP4), mRNA.	1.5566	2.79173
ACOX3	Homo sapiens acyl-Coenzyme A oxidase 3, pristanoyl (ACOX3), mRNA.	1.5553	6.91845
TMEM217	Homo sapiens transmembrane protein 217 (TMEM217), mRNA.	1.5533	6.91845
DENND4C	Homo sapiens DENN/MADD domain containing 4C (DENND4C), mRNA.	1.553	6.01146
SLAMF1	Homo sapiens signaling lymphocytic activation molecule family member 1 (SLAMF1), mRNA.	1.5458	2.79173
ANKRD37	Homo sapiens ankyrin repeat domain 37 (ANKRD37), mRNA.	1.5451	6.01146
FAIM	Homo sapiens Fas apoptotic inhibitory molecule (FAIM), transcript variant 4, mRNA.	1.5407	4.3772
SLC25A26	Homo sapiens solute carrier family 25, member 26 (SLC25A26), transcript variant 1, mRNA.	1.5297	6.01146
ZC3H12C	Homo sapiens zinc finger CCCH-type containing 12C (ZC3H12C), mRNA.	1.5269	2.79173
ARMCX1	Homo sapiens armadillo repeat containing, X-linked 1 (ARMCX1), mRNA.	1.5248	6.01146
ATOX1	Homo sapiens ATX1 antioxidant protein 1 homolog (yeast) (ATOX1), mRNA.	1.5159	6.01146
SSTR2	Homo sapiens somatostatin receptor 2 (SSTR2), mRNA.	1.4973	6.91845
FRAT2	Homo sapiens frequently rearranged in advanced T-cell lymphomas 2 (FRAT2), mRNA.	1.4933	6.91845
P4HA2	Homo sapiens prolyl 4-hydroxylase, alpha polypeptide II (P4HA2), transcript variant 3, mRNA.	1.4899	4.66137
PKD2	Homo sapiens polycystic kidney disease 2 (autosomal dominant) (PKD2), mRNA.	1.4822	6.01146
PAPSS1	Homo sapiens 3'-phosphoadenosine 5'-phosphosulfate synthase 1 (PAPSS1), mRNA.	1.4567	6.01146
DOCK5	Homo sapiens dedicator of cytokinesis 5 (DOCK5), mRNA.	1.44	6.01146

## Sheet: Down regulated
Gene Name	Gene ID	Fold Change	q-value
CCL1	Homo sapiens chemokine (C-C motif) ligand 1 (CCL1), mRNA.	0.2319	4.3772
IFNB1	Homo sapiens interferon, beta 1, fibroblast (IFNB1), mRNA.	0.3239	4.3772
TNFSF8	Homo sapiens tumor necrosis factor (ligand) superfamily, member 8 (TNFSF8), mRNA.	0.3498	4.66137
GUCY1A3	Homo sapiens guanylate cyclase 1, soluble, alpha 3 (GUCY1A3), mRNA.	0.371	0
S100A9	Homo sapiens S100 calcium binding protein A9 (calgranulin B) (S100A9), mRNA.	0.3922	1.83933
C20orf103	Homo sapiens chromosome 20 open reading frame 103 (C20orf103), mRNA.	0.4158	1.83933
LILRA5	Homo sapiens leukocyte immunoglobulin-like receptor, subfamily A (with TM domain), member 5 (LILRA5), transcript variant 3, mRNA.	0.424	4.3772
ADRA1B	Homo sapiens adrenergic, alpha-1B-, receptor (ADRA1B), mRNA.	0.4245	4.3772
FSD1CL	Homo sapiens FSD1 C-terminal like (FSD1CL), mRNA.	0.4319	4.3772
CH25H	Homo sapiens cholesterol 25-hydroxylase (CH25H), mRNA.	0.4344	6.01146
ASPHD2	Homo sapiens aspartate beta-hydroxylase domain containing 2 (ASPHD2), mRNA.	0.4393	0
KCNJ2	Homo sapiens potassium inwardly-rectifying channel, subfamily J, member 2 (KCNJ2), mRNA.	0.4454	6.01146
IL19	Homo sapiens interleukin 19 (IL19), transcript variant 2, mRNA.	0.4608	6.01146
IL12B	Homo sapiens interleukin 12B (natural killer cell stimulatory factor 2, cytotoxic lymphocyte maturation factor 2, p40) (IL12B), mRNA.	0.4684	0
CCL19	Homo sapiens chemokine (C-C motif) ligand 19 (CCL19), mRNA.	0.4726	1.83933
CALCRL	Homo sapiens calcitonin receptor-like (CALCRL), mRNA.	0.476	4.3772
IL29	Homo sapiens interleukin 29 (interferon, lambda 1) (IL29), mRNA.	0.4771	6.01146
AKR1C3	Homo sapiens aldo-keto reductase family 1, member C3 (3-alpha hydroxysteroid dehydrogenase, type II) (AKR1C3), mRNA.	0.4798	6.01146
FRAG1	Homo sapiens FGF receptor activating protein 1 (FRAG1), mRNA.	0.4887	4.3772
TLR4	Homo sapiens toll-like receptor 4 (TLR4), mRNA.	0.4888	1.83933
NET1	Homo sapiens neuroepithelial cell transforming 1 (NET1), transcript variant 1, mRNA.	0.5255	4.3772
NCF1B	Homo sapiens neutrophil cytosolic factor 1B pseudogene (NCF1B), non-coding RNA.	0.5389	6.91845
CYBB	Homo sapiens cytochrome b-245, beta polypeptide (chronic granulomatous disease) (CYBB), mRNA.	0.5544	6.91845
ICAM2	Homo sapiens intercellular adhesion molecule 2 (ICAM2), transcript variant 1, mRNA.	0.5554	6.01146
MT1X	Homo sapiens metallothionein 1X (MT1X), mRNA.	0.5619	4.3772
FGL2	Homo sapiens fibrinogen-like 2 (FGL2), mRNA.	0.5669	6.01146
FEZ1	Homo sapiens fasciculation and elongation protein zeta 1 (zygin I) (FEZ1), transcript variant 2, mRNA.	0.5774	4.66137
GALM	Homo sapiens galactose mutarotase (aldose 1-epimerase) (GALM), mRNA.	0.5778	4.66137
CITED2	Homo sapiens Cbp/p300-interacting transactivator, with Glu/Asp-rich carboxy-terminal domain, 2 (CITED2), transcript variant 1, mRNA.	0.5814	6.01146
PRDM8	Homo sapiens PR domain containing 8 (PRDM8), transcript variant 1, mRNA.	0.5843	4.3772
MS4A7	Homo sapiens membrane-spanning 4-domains, subfamily A, member 7 (MS4A7), transcript variant 2, mRNA.	0.5881	4.66137
CD70	Homo sapiens CD70 molecule (CD70), mRNA.	0.5886	4.3772
CSAG3A	Homo sapiens CSAG family, member 3A (CSAG3A), mRNA.	0.5983	4.3772
SERPINB7	Homo sapiens serpin peptidase inhibitor, clade B (ovalbumin), member 7 (SERPINB7), transcript variant 1, mRNA.	0.6097	4.66137
TNFSF4	Homo sapiens tumor necrosis factor (ligand) superfamily, member 4 (tax-transcriptionally activated glycoprotein 1, 34kDa) (TNFSF4), mRNA.	0.6457	6.91845
LILRB2	Homo sapiens leukocyte immunoglobulin-like receptor, subfamily B (with TM and ITIM domains), member 2 (LILRB2), transcript variant 2, mRNA.	0.6689	6.91845
