# Supplementary material for: Cocoa procyanidins modulate transcriptional pathways linked to inflammation and metabolism in human dendritic cells
Source: Royal Society of Chemistry journal article supplement (doi:10.1039/c8fo00387d), 2018-01-01
Supplement: c8fo00387d3.xlsx [file c8fo00387d3.xlsx]

## Sheet: Upregulated pathways
NAME	Nominal p-value	FDR q-value
KEGG_LYSOSOME	0	0.000889888
KEGG_VIBRIO_CHOLERAE_INFECTION	0	0.00488248
REACTOME_CHOLESTEROL_BIOSYNTHESIS	0	0.00382267
REACTOME_TRANSFERRIN_ENDOCYTOSIS_AND_RECYCLING	0	0.00556823
REACTOME_IRON_UPTAKE_AND_TRANSPORT	0	0.0260717
REACTOME_INSULIN_RECEPTOR_RECYCLING	0	0.0235205
REACTOME_TRANSMEMBRANE_TRANSPORT_OF_SMALL_MOLECULES	0	0.0719561
REACTOME_METABOLISM_OF_CARBOHYDRATES	0	0.122991
REACTOME_SLC_MEDIATED_TRANSMEMBRANE_TRANSPORT	0	0.179596
REACTOME_3_UTR_MEDIATED_TRANSLATIONAL_REGULATION	0.00162338	0.302423
REACTOME_TRANSPORT_OF_INORGANIC_CATIONS_ANIONS_AND_AMINO_ACIDS_OLIGOPEPTIDES	0.00174216	0.0719906
KEGG_AMINO_SUGAR_AND_NUCLEOTIDE_SUGAR_METABOLISM	0.00176367	0.11497
REACTOME_PEPTIDE_CHAIN_ELONGATION	0.00495868	0.310926
REACTOME_AMINO_ACID_TRANSPORT_ACROSS_THE_PLASMA_MEMBRANE	0.00581395	0.180426
REACTOME_GLUCOSE_METABOLISM	0.0071048	0.215652
REACTOME_SPHINGOLIPID_METABOLISM	0.00927644	0.220929
REACTOME_METABOLISM_OF_VITAMINS_AND_COFACTORS	0.0106383	0.226074
REACTOME_BASIGIN_INTERACTIONS	0.0108108	0.226161
REACTOME_GLYCOSPHINGOLIPID_METABOLISM	0.010989	0.236068
REACTOME_GLUCONEOGENESIS	0.0110294	0.171108
REACTOME_LATENT_INFECTION_OF_HOMO_SAPIENS_WITH_MYCOBACTERIUM_TUBERCULOSIS	0.0110497	0.246735
PID_SYNDECAN_1_PATHWAY	0.0161002	0.252729
REACTOME_TRIGLYCERIDE_BIOSYNTHESIS	0.0165138	0.261006
REACTOME_AMINO_ACID_AND_OLIGOPEPTIDE_SLC_TRANSPORTERS	0.0166976	0.222631
KEGG_RIBOSOME	0.0175719	0.364799
REACTOME_INTEGRATION_OF_ENERGY_METABOLISM	0.0182119	0.3571
NABA_ECM_REGULATORS	0.0189003	0.356967
KEGG_EPITHELIAL_CELL_SIGNALING_IN_HELICOBACTER_PYLORI_INFECTION	0.0197842	0.334396
REACTOME_SIGNALING_BY_INSULIN_RECEPTOR	0.0216306	0.353452
PID_MTOR_4PATHWAY	0.0241379	0.356876
BIOCARTA_CXCR4_PATHWAY	0.0251451	0.30237
PID_INTEGRIN1_PATHWAY	0.0257353	0.294347
PID_BMP_PATHWAY	0.0300188	0.36679
REACTOME_GLYCOSAMINOGLYCAN_METABOLISM	0.0325342	0.371453
REACTOME_LIPID_DIGESTION_MOBILIZATION_AND_TRANSPORT	0.0333333	0.371122
REACTOME_O_LINKED_GLYCOSYLATION_OF_MUCINS	0.0338681	0.335626
KEGG_STARCH_AND_SUCROSE_METABOLISM	0.0341727	0.351922
REACTOME_DAG_AND_IP3_SIGNALING	0.0344203	0.302636
ST_MYOCYTE_AD_PATHWAY	0.0375235	0.332874
REACTOME_G_ALPHA_Z_SIGNALLING_EVENTS	0.0386847	0.358243
KEGG_PPAR_SIGNALING_PATHWAY	0.0388007	0.337608
PID_MYC_REPRESS_PATHWAY	0.0407801	0.353194
REACTOME_ACTIVATION_OF_THE_MRNA_UPON_BINDING_OF_THE_CAP_BINDING_COMPLEX_AND_EIFS_AND_SUBSEQUENT_BINDING_TO_43S	0.0441696	0.383952
REACTOME_SIGNAL_TRANSDUCTION_BY_L1	0.0457746	0.362067
REACTOME_EXTRACELLULAR_MATRIX_ORGANIZATION	0.0464684	0.403189
PID_S1P_S1P3_PATHWAY	0.0477876	0.367048
REACTOME_PHOSPHOLIPASE_C_MEDIATED_CASCADE	0.0492424	0.354893
REACTOME_GLYCOLYSIS	0.0494506	0.347735
PID_IL1_PATHWAY	0.0498221	0.353502
ST_ADRENERGIC	0.0504505	0.347463
PID_FRA_PATHWAY	0.0507246	0.351901
REACTOME_FORMATION_OF_THE_TERNARY_COMPLEX_AND_SUBSEQUENTLY_THE_43S_COMPLEX	0.0510563	0.388254
REACTOME_HEPARAN_SULFATE_HEPARIN_HS_GAG_METABOLISM	0.0510563	0.399314

## Sheet: Downregulated pathways
NAME	Nominal p-value	FDR q-value
NABA_SECRETED_FACTORS	0	0
KEGG_CYTOKINE_CYTOKINE_RECEPTOR_INTERACTION	0	0
REACTOME_DEPOSITION_OF_NEW_CENPA_CONTAINING_NUCLEOSOMES_AT_THE_CENTROMERE	0	0
REACTOME_RNA_POL_I_PROMOTER_OPENING	0	0
PID_IL23_PATHWAY	0	0
REACTOME_PACKAGING_OF_TELOMERE_ENDS	0	0
REACTOME_AMYLOIDS	0	0
REACTOME_TELOMERE_MAINTENANCE	0	0.00270723
REACTOME_CHEMOKINE_RECEPTORS_BIND_CHEMOKINES	0	0.00636466
PID_IL27_PATHWAY	0	0.00618269
KEGG_JAK_STAT_SIGNALING_PATHWAY	0	0.00894129
REACTOME_MEIOTIC_SYNAPSIS	0	0.0187468
REACTOME_RNA_POL_I_TRANSCRIPTION	0	0.0181823
REACTOME_CHROMOSOME_MAINTENANCE	0	0.0212459
KEGG_CYTOSOLIC_DNA_SENSING_PATHWAY	0	0.0198295
BIOCARTA_IL12_PATHWAY	0	0.0258484
REACTOME_MEIOTIC_RECOMBINATION	0	0.0265137
REACTOME_RNA_POL_I_RNA_POL_III_AND_MITOCHONDRIAL_TRANSCRIPTION	0	0.0301626
KEGG_CHEMOKINE_SIGNALING_PATHWAY	0	0.0287109
NABA_MATRISOME_ASSOCIATED	0	0.0276691
KEGG_TOLL_LIKE_RECEPTOR_SIGNALING_PATHWAY	0	0.0696789
REACTOME_GPCR_LIGAND_BINDING	0	0.0694394
NABA_MATRISOME	0	0.0862365
KEGG_SYSTEMIC_LUPUS_ERYTHEMATOSUS	0	0.116699
REACTOME_SIGNALING_BY_GPCR	0	0.247672
REACTOME_CELL_CYCLE	0	0.2389
REACTOME_GPCR_DOWNSTREAM_SIGNALING	0	0.293754
KEGG_NOD_LIKE_RECEPTOR_SIGNALING_PATHWAY	0.00240964	0.076011
REACTOME_CLASS_A1_RHODOPSIN_LIKE_RECEPTORS	0.00251889	0.0818107
REACTOME_TRANSCRIPTION	0.00285714	0.154728
BIOCARTA_INFLAM_PATHWAY	0.00449438	0.0195787
PID_IL12_STAT4_PATHWAY	0.00454545	0.0525611
REACTOME_RIG_I_MDA5_MEDIATED_INDUCTION_OF_IFN_ALPHA_BETA_PATHWAYS	0.004662	0.117251
REACTOME_MEIOSIS	0.00485437	0.129877
KEGG_RIG_I_LIKE_RECEPTOR_SIGNALING_PATHWAY	0.00681818	0.0692938
PID_RAC1_REG_PATHWAY	0.00688073	0.101722
ST_ERK1_ERK2_MAPK_PATHWAY	0.00913242	0.0667551
KEGG_LEISHMANIA_INFECTION	0.00921659	0.184574
KEGG_ARACHIDONIC_ACID_METABOLISM	0.00925926	0.0885006
REACTOME_G_ALPHA1213_SIGNALLING_EVENTS	0.0117647	0.218348
REACTOME_P53_INDEPENDENT_G1_S_DNA_DAMAGE_CHECKPOINT	0.0117925	0.194602
PID_TOLL_ENDOGENOUS_PATHWAY	0.012685	0.0865866
REACTOME_ANTIGEN_PROCESSING_CROSS_PRESENTATION	0.0131926	0.246608
REACTOME_SIGNALING_BY_TGF_BETA_RECEPTOR_COMPLEX	0.0159091	0.227309
REACTOME_PEPTIDE_LIGAND_BINDING_RECEPTORS	0.0172839	0.241877
REACTOME_ER_PHAGOSOME_PATHWAY	0.0197044	0.251498
KEGG_PROTEASOME	0.0215311	0.171638
REACTOME_IL_3_5_AND_GM_CSF_SIGNALING	0.0215311	0.226644
REACTOME_SIGNALING_BY_RHO_GTPASES	0.0215827	0.255009
REACTOME_E2F_MEDIATED_REGULATION_OF_DNA_REPLICATION	0.0224719	0.186283
KEGG_STEROID_HORMONE_BIOSYNTHESIS	0.0243902	0.170939
REACTOME_G1_S_TRANSITION	0.0245098	0.327744
KEGG_FC_EPSILON_RI_SIGNALING_PATHWAY	0.0257009	0.332075
REACTOME_TRAF6_MEDIATED_IRF7_ACTIVATION	0.025974	0.208137
REACTOME_APC_C_CDH1_MEDIATED_DEGRADATION_OF_CDC20_AND_OTHER_APC_C_CDH1_TARGETED_PROTEINS_IN_LATE_MITOSIS_EARLY_G1	0.0261283	0.261531
REACTOME_AUTODEGRADATION_OF_THE_E3_UBIQUITIN_LIGASE_COP1	0.0268293	0.258779
REACTOME_IL_RECEPTOR_SHC_SIGNALING	0.0273349	0.158299
REACTOME_VIF_MEDIATED_DEGRADATION_OF_APOBEC3G	0.027907	0.301691
REACTOME_REGULATION_OF_ORNITHINE_DECARBOXYLASE_ODC	0.028169	0.258792
REACTOME_P53_DEPENDENT_G1_DNA_DAMAGE_RESPONSE	0.0305882	0.336089
REACTOME_AUTODEGRADATION_OF_CDH1_BY_CDH1_APC_C	0.0334129	0.332445
REACTOME_APC_C_CDC20_MEDIATED_DEGRADATION_OF_MITOTIC_PROTEINS	0.0335731	0.317187
REACTOME_CROSS_PRESENTATION_OF_SOLUBLE_EXOGENOUS_ANTIGENS_ENDOSOMES	0.0340633	0.223048
REACTOME_SCF_BETA_TRCP_MEDIATED_DEGRADATION_OF_EMI1	0.0365297	0.299679
ST_PHOSPHOINOSITIDE_3_KINASE_PATHWAY	0.037694	0.247683
KEGG_ERBB_SIGNALING_PATHWAY	0.0390244	0.322798
PID_IL6_7_PATHWAY	0.0393519	0.256112
KEGG_PATHOGENIC_ESCHERICHIA_COLI_INFECTION	0.0458716	0.356597
REACTOME_DESTABILIZATION_OF_MRNA_BY_AUF1_HNRNP_D0	0.0473934	0.360298
PID_TCR_PATHWAY	0.049763	0.367693
REACTOME_TGF_BETA_RECEPTOR_SIGNALING_ACTIVATES_SMADS	0.05	0.24334
